# Supplementary material for: Developing Biomarkers of Mild Traumatic Brain Injury: Promise and Progress of CNS-Derived Exosomes
Source: PubMed Central journal article supplement (PMC8866179; doi:10.3389/fneur.2021.698206), 2022-02-10
Supplement: Table_1.pdf [file Table_1.pdf]

| miRNA Family | Subtype | Population          | Trauma          | Timeframe             | Exosome Source        | NDE/ADE/Total | Ref            |
|--------------|---------|---------------------|-----------------|-----------------------|-----------------------|---------------|----------------|
| 7            | a-5p    | Mice, M, 7-9wks     | CCI             | 7 Days                | Brain Extract         | Total         | Harrison, 2016 |
| 7            | b-5p    | Mice, M, 7-9wks     | CCI             | 7 Days                | Brain Extract         | Total         | Harrison, 2016 |
| let-7        | d       | Human, In Vitro     | IL6 Stimulation | 24 hrs                | Astrocyte Supernatant | ADE           | Gayen, 2020    |
| let-7        | e       | Human, Chronic, Vet | Blast           | ~11 years             | Plasma                | Total         | Devoto, 2021   |
| <b>9*</b>    | 5p      | Mice, M, 12-14wks   | Blast, CCI      | 1 hr, 1, 4, 14 day    | Plasma                | Total         | Ko, 2019       |
| <b>9</b>     | a-3p    | Rats, M, 12-16wks   | Weight Drop     | 24 hrs                | Plasma                | Total         | Wang, 2020     |
| 15           | a-5p    | Mice, M, 7-9wks     | CCI             | 7 Days                | Brain Extract         | Total         | Harrison, 2016 |
| 15           | b-5p    | Mice, M, 7-9wks     | CCI             | 7 Days                | Brain Extract         | Total         | Harrison, 2016 |
| 18a          | 5p      | Human, Chronic, Vet | Blast           | ~11 years             | Plasma                | Total         | Devoto, 2021   |
| 21           | a-5p    | Mice, M, 7-9wks     | CCI             | 7 Days                | Brain Extract         | Total         | Harrison, 2016 |
| 27           | a       | Human, In Vitro     | IL6 Stimulation | 24 hrs                | Astrocyte Supernatant | ADE           | Gayen, 2020    |
| <b>29</b>    | a       | Human, In Vitro     | IL6 Stimulation | 24 hrs                | Astrocyte Supernatant | ADE           | Gayen, 2020    |
| <b>29</b>    | b-3p    | Rats, M, 12-16wks   | Weight Drop     | 24 hrs                | Plasma                | Total         | Wang, 2020     |
| 30*          | d       | Human, In Vitro     | IL6 Stimulation | 24 hrs                | Astrocyte Supernatant | ADE           | Gayen, 2020    |
| <b>31</b>    |         | Human, In Vitro     | IL6 Stimulation | 24 hrs                | Astrocyte Supernatant | ADE           | Gayen, 2020    |
| <b>31</b>    | 5p      | Human, Chronic, Vet | Blast           | ~11 years             | Plasma                | Total         | Devoto, 2021   |
| 92           | b-3p    | Mice, M, 7-9 wks    | CCI             | 7 Days                | Brain Extract         | Total         | Harrison, 2016 |
| 93           |         | Human, In Vitro     | IL6 Stimulation | 24 hrs                | Astrocyte Supernatant | ADE           | Gayen, 2020    |
| 100          | 5p      | Mice, M, 10-12wks   | CCI, Rep TBI    | 3, 7, 14, 21, 28 Days | Brain Extract         | ADE           | Huang, 2017    |
| 106          | b-5p    | Rats, M, 12-16wks   | Weight Drop     | 24 hrs                | Plasma                | Total         | Wang, 2020     |
| 107          |         | Human, Chronic, Vet | Blast           | ~11 years             | Plasma                | Total         | Devoto, 2021   |
| <b>124*</b>  | 3p      | Mice, M, 10-12wks   | CCI, Rep TBI    | 3, 7, 14, 21, 28 Days | Brain Extract         | ADE           | Huang, 2017    |
| 124          | 1       | Mice, M, 10-12wks   | CCI, Rep TBI    | 3, 7, 14, 21, 28 Days | Brain Extract         | ADE           | Huang, 2017    |
| 124          | 3       | Mice, M, 10-12wks   | CCI, Rep TBI    | 3, 7, 14, 21, 28 Days | Brain Extract         | ADE           | Huang, 2017    |
| 124          | 2       | Mice, M, 10-12wks   | CCI, Rep TBI    | 3, 7, 14, 21, 28 Days | Brain Extract         | ADE           | Huang, 2017    |
| <b>124</b>   | 3p      | Mice, M, 12 wks     | CCI, Rep & mTBI | 3, 14 Days            | Brain Extract         | ADE           | Ge, 2020       |
| <b>124</b>   | 3p      | Rats, M, 12-16wks   | Weight Drop     | 24 hrs                | Plasma                | Total         | Wang, 2020     |
| 125          | a-5p    | Mice, M, 10-12wks   | CCI, Rep TBI    | 3, 7, 14, 21, 28 Days | Brain Extract         | ADE           | Huang, 2017    |
| 126          |         | Human, In Vitro     | IL6 Stimulation | 24 hrs                | Astrocyte Supernatant | ADE           | Gayen, 2020    |
| 127          | 3p      | Mice, M, 10-12wks   | CCI, Rep TBI    | 3, 7, 14, 21, 28 Days | Brain Extract         | ADE           | Huang, 2017    |
| 128*         | 3p      | Mice, M, 10-12wks   | CCI, Rep TBI    | 3, 7, 14, 21, 28 Days | Brain Extract         | ADE           | Huang, 2017    |

| miRNA Family | Subtype       | Population                | Trauma          | Timeframe             | Exosome Source        | NDE/ADE/Total | Ref                 |
|--------------|---------------|---------------------------|-----------------|-----------------------|-----------------------|---------------|---------------------|
| <b>130*</b>  | a-3p          | Mice, M, 7-9 wks          | CCI             | 7 Days                | Brain Extract         | Total         | Harrison, 2016      |
| <b>130</b>   | <b>b</b>      | Human, In Vitro           | IL6 Stimulation | 24 hrs                | Astrocyte Supernatant | ADE           | Gayen, 2020         |
| <b>133</b>   | <b>a-3p</b>   | Mice, M, 7-9 wks          | CCI             | 7 Days                | Brain Extract         | Total         | Harrison, 2016      |
| <b>133</b>   | <b>b-3p</b>   | Mice, M, 7-9 wks          | CCI             | 7 Days                | Brain Extract         | Total         | Harrison, 2016      |
| 138          | 5p            | Mice, M, 10-12wks         | CCI, Rep TBI    | 3, 7, 14, 21, 28 Days | Brain Extract         | ADE           | Huang, 2017         |
| <b>139*</b>  | <b>5p</b>     | Human, In Vitro           | IL6 Stimulation | 24 hrs                | Astrocyte Supernatant | ADE           | Gayen, 2020         |
| 141          |               | Human, In Vitro           | IL6 Stimulation | 24 hrs                | Astrocyte Supernatant | ADE           | Gayen, 2020         |
| <b>142</b>   | <b>a-5p</b>   | Mice, M, 7-9 wks          | CCI             | 7 Days                | Brain Extract         | Total         | Harrison, 2016      |
| <b>142</b>   | <b>3p</b>     | Rats, M, 12-16wks         | Weight Drop     | 24 hrs                | Plasma                | Total         | Wang, 2020          |
| 143          |               | Human, In Vitro           | IL6 Stimulation | 24 hrs                | Astrocyte Supernatant | ADE           | Gayen, 2020         |
| <b>145*</b>  |               | Human, In Vitro           | IL6 Stimulation | 24 hrs                | Astrocyte Supernatant | ADE           | Gayen, 2020         |
| <b>146</b>   | <b>a-5p</b>   | Mice, M, 7-9 wks          | CCI             | 7 Days                | Brain Extract         | Total         | Harrison, 2016      |
| <b>146</b>   | <b>a</b>      | Human, In Vitro           | IL6 Stimulation | 24 hrs                | Astrocyte Supernatant | ADE           | Gayen, 2020         |
| 151          | 3p            | Mice, M, 7-9 wks          | CCI             | 7 Days                | Brain Extract         | Total         | Harrison, 2016      |
| 152          |               | Human, In Vitro           | IL6 Stimulation | 24 hrs                | Astrocyte Supernatant | ADE           | Gayen, 2020         |
| <b>181</b>   | <b>b-1-3p</b> | Mice, M, 7-9 wks          | CCI             | 7 Days                | Brain Extract         | Total         | Harrison, 2016      |
| <b>181</b>   | <b>c-3p</b>   | Rats, M, 12-16wks         | Weight Drop     | 24 hrs                | Plasma                | Total         | Wang, 2020          |
| 185          | 5p            | Human, Civilian           | Mild TBI        | 1 day                 | Plasma                | Total         | Ko, 2019            |
| 192          |               | Human, In Vitro           | IL6 Stimulation | 24 hrs                | Astrocyte Supernatant | ADE           | Gayen, 2020         |
| 193          | a-3p          | Mice, M, 7-9 wks          | CCI             | 7 Days                | Brain Extract         | Total         | Harrison, 2016      |
| 194          |               | Human, In Vitro           | IL6 Stimulation | 24 hrs                | Astrocyte Supernatant | ADE           | Gayen, 2020         |
| <b>195</b>   |               | Human, In Vitro           | IL6 Stimulation | 24 hrs                | Astrocyte Supernatant | ADE           | Gayen, 2020         |
| <b>195</b>   | <b>3p</b>     | Rats, M, 12-16wks         | Weight Drop     | 24 hrs                | Plasma                | Total         | Wang, 2020          |
| 197          |               | Human, In Vitro           | IL6 Stimulation | 24 hrs                | Astrocyte Supernatant | ADE           | Gayen, 2020         |
| <b>200</b>   | <b>b</b>      | Human, In Vitro           | IL6 Stimulation | 24 hrs                | Astrocyte Supernatant | ADE           | Gayen, 2020         |
| <b>200</b>   | <b>c</b>      | Human, In Vitro           | IL6 Stimulation | 24 hrs                | Astrocyte Supernatant | ADE           | Gayen, 2020         |
| <b>203*</b>  | <b>3p</b>     | Mice, M, 7-9 wks          | CCI             | 7 Days                | Brain Extract         | Total         | Harrison, 2016      |
| <b>203</b>   |               | Human, In Vitro           | IL6 Stimulation | 24 hrs                | Astrocyte Supernatant | ADE           | Gayen, 2020         |
| <b>204</b>   | <b>5p</b>     | <b>Human, Chronic Vet</b> | <b>Blast</b>    | <b>~11 years</b>      | <b>Plasma</b>         | <b>Total</b>  | <b>Devoto, 2021</b> |
| <b>204</b>   | <b>5p</b>     | <b>Human, Chronic Vet</b> | <b>mTBI</b>     | <b>~9 years</b>       | <b>Plasma</b>         | <b>Total</b>  | <b>Guedes, 2021</b> |

| miRNA Family | Subtype       | Population                | Trauma          | Timeframe             | Exosome Source        | NDE/ADE/Total | Ref                 |
|--------------|---------------|---------------------------|-----------------|-----------------------|-----------------------|---------------|---------------------|
| 206          |               | Human, Civilian           | Mild TBI        | 1 day                 | Plasma                | Total         | Ko, 2019            |
| 215          |               | Human, In Vitro           | IL6 Stimulation | 24 hrs                | Astrocyte Supernatant | ADE           | Gayen, 2020         |
| 218          | 3p            | Mice, M, 10-12wks         | CCI, Rep TBI    | 3, 7, 14, 21, 28 Days | Brain Extract         | ADE           | Huang, 2017         |
| <b>219</b>   | <b>a-5p</b>   | Mice, M, 7-9 wks          | CCI             | 7 Days                | Brain Extract         | Total         | Harrison, 2016      |
| <b>219</b>   | <b>a-2-3p</b> | Mice, M, 7-9 wks          | CCI             | 7 Days                | Brain Extract         | Total         | Harrison, 2016      |
| <b>219</b>   | <b>a.2-3p</b> | Mice, M, 12-14 wk         | Blast, CCI      | 1 hr, 1, 4, 14 day    | Plasma                | Total         | Ko, 2019            |
| 300          | 5p            | Mice, M, 7-9 wks          | CCI             | 7 Days                | Brain Extract         | Total         | Harrison, 2016      |
| 328          | a-5p          | Rats, M, 12-16wks         | Weight Drop     | 24 hrs                | Plasma                | Total         | Wang, 2020          |
| 335*         | 5p            | Mice, M, 10-12wks         | CCI, Rep TBI    | 3, 7, 14, 21, 28 Days | Brain Extract         | ADE           | Huang, 2017         |
| 335          |               | Mice, M, 10-12wks         | CCI, Rep TBI    | 3, 7, 14, 21, 28 Days | Brain Extract         | ADE           | Huang, 2017         |
| 338          | 3p            | Mice, M, 7-9 wks          | CCI             | 7 Days                | Brain Extract         | Total         | Harrison, 2016      |
| 346          |               | Human, Chronic, Vet       | Blast           | ~11 years             | Plasma                | Total         | Devoto, 2021        |
| 350          | 3p            | Mice, M, 7-9 wks          | CCI             | 7 Days                | Brain Extract         | Total         | Harrison, 2016      |
| 361*         | 3p            | Rats, M, 12-16wks         | Weight Drop     | 24 hrs                | Plasma                | Total         | Wang, 2020          |
| <b>372</b>   | <b>3p</b>     | <b>Human, Chronic Vet</b> | <b>Blast</b>    | <b>~11 years</b>      | <b>Plasma</b>         | <b>Total</b>  | <b>Devoto, 2021</b> |
| <b>372</b>   | <b>3p</b>     | <b>Human, Chronic Vet</b> | <b>mTBI</b>     | <b>~9 years</b>       | <b>Plasma</b>         | <b>Total</b>  | <b>Guedes, 2021</b> |
| 374          | 5p            | Rats, M, 12-16wks         | Weight Drop     | 24 hrs                | Plasma                | Total         | Wang, 2020          |
| <b>375</b>   |               | Human, In Vitro           | IL6 Stimulation | 24 hrs                | Astrocyte Supernatant | ADE           | Gayen, 2020         |
| <b>375</b>   |               | Human, Chronic, Vet       | Blast           | ~11 years             | Plasma                | Total         | Devoto, 2021        |
| <b>376</b>   | b-3p          | Mice, M, 10-12wks         | CCI, Rep TBI    | 3, 7, 14, 21, 28 Days | Brain Extract         | ADE           | Huang, 2017         |
| <b>376</b>   | b-3p          | Human, Chronic, Vet       | Blast           | ~11 years             | Plasma                | Total         | Devoto, 2021        |
| <b>382</b>   | <b>3p</b>     | Human, Chronic, Vet       | Blast           | ~11 years             | Plasma                | Total         | Devoto, 2021        |
| <b>382</b>   | <b>5p</b>     | Mice, M, 10-12wks         | CCI, Rep TBI    | 3, 7, 14, 21, 28 Days | Brain Extract         | ADE           | Huang, 2017         |
| <b>434</b>   | 3p            | Mice, M, 10-12wks         | CCI, Rep TBI    | 3, 7, 14, 21, 28 Days | Brain Extract         | ADE           | Huang, 2017         |
| <b>434</b>   | 3p            | Rats, M, 12-16wks         | Weight Drop     | 24 hrs                | Plasma                | Total         | Wang, 2020          |
| 450b         | 3p            | Human, Chronic, Vet       | Blast           | ~11 years             | Plasma                | Total         | Devoto, 2021        |
| 488          | 3p            | Mice, M, 12-14 wk         | Blast, CCI      | 1 hr, 1, 4, 14 day    | Plasma                | Total         | Ko, 2019            |
| 494          |               | Human, In Vitro           | IL6 Stimulation | 24 hrs                | Astrocyte Supernatant | ADE           | Gayen, 2020         |
| 495          | 3p            | Mice, M, 10-12wks         | CCI, Rep TBI    | 3, 7, 14, 21, 28 Days | Brain Extract         | ADE           | Huang, 2017         |
| 509          | 3-5p          | Human, Chronic Vet        | mTBI            | ~9 years              | Plasma                | Total         | Guedes, 2021        |

| miRNA Family | Subtype   | Population                | Trauma          | Timeframe        | Exosome Source        | NDE/ADE/Total | Ref                 |
|--------------|-----------|---------------------------|-----------------|------------------|-----------------------|---------------|---------------------|
| 520          | d-3p      | Human, In Vitro           | IL6 Stimulation | 24 hrs           | Astrocyte Supernatant | ADE           | Gayen, 2020         |
| 532          | 5p        | Rats, M, 12-16wks         | Weight Drop     | 24 hrs           | Plasma                | Total         | Wang, 2020          |
| 539          |           | Human, In Vitro           | IL6 Stimulation | 24 hrs           | Astrocyte Supernatant | ADE           | Gayen, 2020         |
| 542          | 3p        | Mice, M, 7-9 wks          | CCI             | 7 Days           | Brain Extract         | Total         | Harrison, 2016      |
| 567          |           | Human, Chronic, Vet       | Blast           | ~11 years        | Plasma                | Total         | Devoto, 2021        |
| <b>615</b>   | <b>5p</b> | <b>Human, Chronic Vet</b> | <b>Blast</b>    | <b>~11 years</b> | <b>Plasma</b>         | <b>Total</b>  | <b>Devoto, 2021</b> |
| <b>615</b>   | <b>5p</b> | <b>Human, Chronic Vet</b> | <b>mTBI</b>     | <b>~9 years</b>  | <b>Plasma</b>         | <b>Total</b>  | <b>Guedes, 2021</b> |
| 885          | 5p        | Human, In Vitro           | IL6 Stimulation | 24 hrs           | Astrocyte Supernatant | ADE           | Gayen, 2020         |
| 1183         |           | Human, Chronic, Vet       | Blast           | ~11 years        | Plasma                | Total         | Devoto, 2021        |
| 1233         | 3p        | Human, Chronic, Vet       | Blast           | ~11 years        | Plasma                | Total         | Devoto, 2021        |
| <b>1277</b>  | <b>3p</b> | <b>Human, Chronic Vet</b> | <b>Blast</b>    | <b>~11 years</b> | <b>Plasma</b>         | <b>Total</b>  | <b>Devoto, 2021</b> |
| <b>1277</b>  | <b>3p</b> | <b>Human, Chronic Vet</b> | <b>mTBI</b>     | <b>~9 years</b>  | <b>Plasma</b>         | <b>Total</b>  | <b>Guedes, 2021</b> |
| 1543         | 3p        | Mice, M, 7-9 wks          | CCI             | 7 Days           | Brain Extract         | Total         | Harrison, 2016      |
| 1185         | 1-3p      | Human, Chronic Vet        | mTBI            | ~9 years         | Plasma                | Total         | Guedes, 2021        |
| 2887         | 2-3p      | Mice, M, 7-9 wks          | CCI             | 7 Days           | Brain Extract         | Total         | Harrison, 2016      |
| 3099         | 3p        | Mice, M, 7-9 wks          | CCI             | 7 Days           | Brain Extract         | Total         | Harrison, 2016      |
| <b>3190</b>  | <b>3p</b> | <b>Human, Chronic Vet</b> | <b>Blast</b>    | <b>~11 years</b> | <b>Plasma</b>         | <b>Total</b>  | <b>Devoto, 2021</b> |
| <b>3190</b>  | <b>3p</b> | <b>Human, Chronic Vet</b> | <b>mTBI</b>     | <b>~9 years</b>  | <b>Plasma</b>         | <b>Total</b>  | <b>Guedes, 2021</b> |
| 3196         |           | Human, Chronic Vet        | mTBI            | ~9 years         | Plasma                | Total         | Guedes, 2021        |
| 3470         | b-3p      | Mice, M, 7-9 wks          | CCI             | 7 Days           | Brain Extract         | Total         | Harrison, 2016      |
| 3959         | 3p        | Mice, M, 7-9 wks          | CCI             | 7 Days           | Brain Extract         | Total         | Harrison, 2016      |
| 5001         | 5p        | Human, Chronic, Vet       | Blast           | ~11 years        | Plasma                | Total         | Devoto, 2021        |
| 5099         | 3p        | Mice, M, 7-9 wks          | CCI             | 7 Days           | Brain Extract         | Total         | Harrison, 2016      |
| 6096         | 5p        | Mice, M, 12 wks           | CCI, Rep & mTBI | 3, 14, 42 Days   | Brain Extract         | ADE           | Ge, 2020            |
| 6395         |           | Mice, M, 7-9 wks          | CCI             | 7 Days           | Brain Extract         | Total         | Harrison, 2016      |

**Supplemental Table 1: Overexpressed miRNA across species.** This table details miRNA which has been identified as undergoing a significant increase in expression levels after traumatic brain injury. M = male, Vet = Veteran, CCI = controlled cortical impact, Rep TBI = repetitive TBI. Items in bold are miRNA families identified in multiple studies. Items with \* have been identified as being significantly under-expressed by a different study (listed in Supplemental Table 2).
