# Supplementary material for: Developing Biomarkers of Mild Traumatic Brain Injury: Promise and Progress of CNS-Derived Exosomes
Source: PubMed Central journal article supplement (PMC8866179; doi:10.3389/fneur.2021.698206), 2022-02-10
Supplement: Table_2.pdf [file Table_2.pdf]

| miRNA Family | Subtype     | Pop                | Trauma      | Time Point(s)     | Exosome Source | NDE/ADE Total | Source         |
|--------------|-------------|--------------------|-------------|-------------------|----------------|---------------|----------------|
| <b>9*</b>    | <b>a-5p</b> | Rats, M, 12-16wks  | Weight Drop | 24hrs             | Plasma         | Total         | Wang, 2020     |
| 22           | 5p          | Mice, M, 12-14wks  | Blast, CCI  | 1hr, 1, 4, 14 day | Plasma         | Total         | Ko, 2019       |
| 26           | a-5p        | Mice, M, 7-9wks    | CCI         | 7 Days            | Brain Extract  | Total         | Harrison, 2016 |
| 28           | 3p          | Rats, M, 12-16wks  | Weight Drop | 24hrs             | Plasma         | Total         | Wang, 2020     |
| <b>30*</b>   | <b>e-3p</b> | Mice, M, 7-9wks    | CCI         | 7 Days            | Brain Extract  | Total         | Harrison, 2016 |
| <b>30</b>    | <b>a-3p</b> | Mice, M, 7-9wks    | CCI         | 7 Days            | Brain Extract  | Total         | Harrison, 2016 |
| 92           | a-3p        | Rats, M, 12-16wks  | Weight Drop | 24hrs             | Plasma         | Total         | Wang, 2020     |
| 96           | 5p          | Rats, M, 12-16wks  | Weight Drop | 24hrs             | Plasma         | Total         | Wang, 2020     |
| <b>124*</b>  | <b>3p</b>   | Mice, M, 12wks     | CCI, Rep    | 42 Days           | Brain Extract  | ADE           | Ge, 2020       |
| <b>128*</b>  | <b>2-5p</b> | Mice, M, 7-9wks    | CCI         | 7 Days            | Brain Extract  | Total         | Harrison, 2016 |
| <b>128</b>   | <b>1-5p</b> | Mice, M, 7-9wks    | CCI         | 7 Days            | Brain Extract  | Total         | Harrison, 2016 |
| <b>128</b>   | <b>3p</b>   | Mice, M, 7-9wks    | CCI         | 7 Days            | Brain Extract  | Total         | Harrison, 2016 |
| <b>130*</b>  | <b>b-5p</b> | Mice, M, 7-9wks    | CCI         | 7 Days            | Brain Extract  | Total         | Harrison, 2016 |
| <b>139*</b>  | <b>3p</b>   | Mice, M, 7-9wks    | CCI         | 7 Days            | Brain Extract  | Total         | Harrison, 2016 |
| <b>139</b>   | <b>5p</b>   | Human, Chronic Vet | Blast       | ~11 years         | Plasma         | Total         | Devoto, 2021   |
| <b>139</b>   | <b>5p</b>   | Human, Chronic Vet | mTBI        | ~9 years          | Plasma         | Total         | Guedes 2021    |
| <b>145*</b>  | <b>3p</b>   | Rats, M, 12-16wks  | Weight Drop | 24hrs             | Plasma         | Total         | Wang, 2020     |
| <b>150</b>   | <b>5p</b>   | Mice, M, 12-14wk   | Blast, CCI  | 1hr, 1, 4, 14 day | Plasma         | Total         | Ko, 2019       |

|             |             |                     |             |                   |               |       |                |
|-------------|-------------|---------------------|-------------|-------------------|---------------|-------|----------------|
| <b>150</b>  | <b>5p</b>   | Human, Chronic, Vet | Blast       | ~11 years         | Plasma        | Total | Devoto, 2021   |
| <b>203*</b> | <b>b-5p</b> | Human, Civilian     | Mild TBI    | 1 day             | Plasma        | Total | Ko, 2019       |
| <b>203</b>  | <b>a-3p</b> | Human, Civilian     | Mild TBI    | 1 day             | Plasma        | Total | Ko, 2019       |
| 212         | 5p          | Mice, M, 7-9wks     | CCI         | 7 Days            | Brain Extract | Total | Harrison, 2016 |
| <b>221</b>  | <b>3p</b>   | Mice, M, 7-9wks     | CCI         | 7 Days            | Brain Extract | Total | Harrison, 2016 |
| <b>221</b>  | <b>5p</b>   | Rats, M, 12-16wks   | Weight Drop | 24hrs             | Plasma        | Total | Wang, 2020     |
| 222         | 3p          | Mice, M, 7-9wks     | CCI         | 7 Days            | Brain Extract | Total | Harrison, 2016 |
| 229         | b-3p        | Mice, M, 7-9wks     | CCI         | 7 Days            | Brain Extract | Total | Harrison, 2016 |
| 298         | 5p          | Mice, M, 7-9wks     | CCI         | 7 Days            | Brain Extract | Total | Harrison, 2016 |
| <b>335*</b> | <b>3p</b>   | Mice, M, 7-9wks     | CCI         | 7 Days            | Brain Extract | Total | Harrison, 2016 |
| 337         | 5p          | Mice, M, 7-9wks     | CCI         | 7 Days            | Brain Extract | Total | Harrison, 2016 |
| 351         | 3p          | Mice, M, 12-14wks   | Blast, CCI  | 1hr, 1, 4, 14 day | Plasma        | Total | Ko, 2019       |
| <b>361*</b> | <b>3p</b>   | Mice, M, 7-9wks     | CCI         | 7 Days            | Brain Extract | Total | Harrison, 2016 |
| 370         | 5p          | Mice, M, 7-9wks     | CCI         | 7 Days            | Brain Extract | Total | Harrison, 2016 |
| 451         | 5p          | Rats, M, 12-16wks   | Weight Drop | 24hrs             | Plasma        | Total | Wang, 2020     |
| 669         | c-5p        | Mice, M, 12-14wk    | Blast, CCI  | 1hr, 1, 4, 14 day | Plasma        | Total | Ko, 2019       |
| 671         | 5p          | Mice, M, 7-9wks     | CCI         | 7 Days            | Brain Extract | Total | Harrison, 2016 |
| 744         | 3p          | Mice, M, 12wks      | CCI, Rep    | 3, 14, 42 Days    | Brain Extract | ADE   | Ge, 2020       |
| 764         | 3p          | Mice, M, 12wks      | CCI, Rep    | 3, 14, 42 Days    | Brain Extract | ADE   | Ge, 2020       |
| 767         |             | Mice, M, 12wks      | CCI, Rep    | 3, 14, 42 Days    | Brain Extract | ADE   | Ge, 2020       |

|      |      |                   |            |                   |               |       |                |
|------|------|-------------------|------------|-------------------|---------------|-------|----------------|
| 770  | 5p   | Mice, M, 7-9wks   | CCI        | 7 Days            | Brain Extract | Total | Harrison, 2016 |
| 874  | 3p   | Mice, M, 7-9wks   | CCI        | 7 Days            | Brain Extract | Total | Harrison, 2016 |
| 940  | 5p   | Mice, M, 7-9wks   | CCI        | 7 Days            | Brain Extract | Total | Harrison, 2016 |
| 1251 |      | Mice, M, 7-9wks   | CCI        | 7 Days            | Brain Extract | Total | Harrison, 2016 |
| 1843 | b-5p | Mice, M, 7-9wks   | CCI        | 7 Days            | Brain Extract | Total | Harrison, 2016 |
| 3473 | e    | Mice, M, 7-9wks   | CCI        | 7 Days            | Brain Extract | Total | Harrison, 2016 |
| 3547 | 3p   | Mice, M, 7-9wks   | CCI        | 7 Days            | Brain Extract | Total | Harrison, 2016 |
| 4332 | 5p   | Mice, M, 7-9wks   | CCI        | 7 Days            | Brain Extract | Total | Harrison, 2016 |
| 6215 | l    | Mice, M, 7-9wks   | CCI        | 7 Days            | Brain Extract | Total | Harrison, 2016 |
| 6236 |      | Mice, M, 12-14wks | Blast, CCI | 1hr, 1, 4, 14 day | Plasma        | Total | Ko, 2019       |
| 6239 | 5p   | Mice, M, 7-9wks   | CCI        | 7 Days            | Brain Extract | Total | Harrison, 2016 |
| 6240 | 5p   | Mice, M, 7-9wks   | CCI        | 7 Days            | Brain Extract | Total | Harrison, 2016 |
| 6481 | 3p   | Mice, M, 7-9wks   | CCI        | 7 Days            | Brain Extract | Total | Harrison, 2016 |
| 7641 |      | Mice, M, 7-9wks   | CCI        | 7 Days            | Brain Extract | Total | Harrison, 2016 |
| 7641 | 2-5p | Mice, M, 7-9wks   | CCI        | 7 Days            | Brain Extract | Total | Harrison, 2016 |
| 7641 | 2-3p | Mice, M, 7-9wks   | CCI        | 7 Days            | Brain Extract | Total | Harrison, 2016 |
| 7660 | 3p   | Mice, M, 12wks    | CCI, Rep   | 3, 14, 42 Days    | Brain Extract | ADE   | Ge, 2020       |
| 7665 | 5p   | Mice, M, 12wks    | CCI, Rep   | 3, 14, 42 Days    | Brain Extract | ADE   | Ge, 2020       |
| 7674 | 5p   | Mice, M, 12wks    | CCI, Rep   | 3, 14, 42 Days    | Brain Extract | ADE   | Ge, 2020       |
| 7681 | 3p   | Mice, M, 12wks    | CCI, Rep   | 3, 14, 42 Days    | Brain Extract | ADE   | Ge, 2020       |
| 7977 |      | Mice, M, 7-9wks   | CCI        | 7 Days            | Brain Extract | Total | Harrison, 2016 |

|      |    |                 |     |        |               |       |                |
|------|----|-----------------|-----|--------|---------------|-------|----------------|
| 8962 | 5p | Mice, M, 7-9wks | CCI | 7 Days | Brain Extract | Total | Harrison, 2016 |
| 9077 | 5p | Mice, M, 7-9wks | CCI | 7 Days | Brain Extract | Total | Harrison, 2016 |
| 9342 | 5p | Mice, M, 7-9wks | CCI | 7 Days | Brain Extract | Total | Harrison, 2016 |

**Supplemental Table 2: Underexpressed miRNA across species.** This table details miRNA which has been identified as undergoing a significant decrease in expression levels after traumatic brain injury. M = male, Vet = Veteran, CCI = controlled cortical impact, Rep TBI = repetitive TBI. Items in bold are miRNA families identified in multiple studies. Items with \* have been identified as being significantly under-expressed by a different study (listed in **Supplemental Table 1**).
